# Supplementary material
Source: publisher site journal article supplement (https://www.dovepress.com/article/298326)
Supplement: Supplementary file 1 [file get_supplementary_file.php]

**Supplementary Table 1** Comparison of baseline characteristics between 34 subjects with and without EE in the MS group

|  | Subjects without  EE  (n=7) | Subjects with  EE  (n=27) | *p*-value |
| --- | --- | --- | --- |
| Sex (M/F) (%M) | 3/4 (57.1%) | 6/21 (77.8%) | 0.534 |
| Age (years) | 56.4 ± 2.6 | 55.0 ± 4.8 | 0.733 |
| BMI (kg/m2) | 28.9 ± 3.7 | 28.2 ± 5.5 | 0.297 |
| WC (cm) | 97.1 ± 10.8 | 96.6 ± 10.7 | 1.000 |
| Smoker, n (%) | 1 (14.3%) | 5 (18.5%) | 0.768 |
| Drinker, n (%) | 2 (28.6%) | 15 (55.6%) | 0.396 |
| SBP (mmHg) | 141 ± 19 | 141 ± 22 | 0.865 |
| DBP (mmHg) | 95 ± 12 | 94 ± 12 | 0.701 |
| Hypertension, n (%) | 5 (71.4%) | 23 (85.2%) | 0.768 |
| T-CHO (mg/dL) | 207.1 ± 35.0 | 213.3 ± 45.7 | 0.831 |
| TG (mg/dL) | 114.7 ± 36.5 | 161.6 ± 120.5 | 0.360 |
| HDL-C (mg/dL) | 59.0 ± 6.6 | 59.8 ± 13.0 | 0.882 |
| LDL-C (mg/dL) | 131.4 ± 34.7 | 131.4 ± 43.4 | 0.882 |
| Dyslipidemia, n (%) | 5 (71.4%) | 16 (59.3%) | 0.878 |
| FPG (mg/dL) | 107.1 ± 18.6 | 109.2 ± 26.2 | 0.915 |
| HbA1c (%) | 5.9 ± 0.4 | 6.0 ± 0.7 | 0.916 |
| IGT, n (%) | 2 (28.6%) | 9 (33.3%) | 0.831 |
| UA (mg/dL) | 5.7 ± 1.2 | 6.1 ± 1.6 | 0.201 |
| AST (IU/L) | 30.1 ± 7.4 | 30.6 ± 12.5 | 0.798 |
| ALT (IU/L) | 44.3 ± 18.8 | 31.7 ± 14.3 | 0.088 |
| GGT (IU/L) | 75.0 ± 53.5 | 98.9 ± 132.1 | 0.749 |
| Positivity of *H. pylori*, n (%) | 1 (14.3%) | 2 (7.4%) | 0.860 |
| Hiatal hernia, n (%) | 3 (42.9%) | 16 (59.3%) | 0.672 |

**Notes:** Data represent the mean ± standard deviation (SD) and number for categorical variables. All *p*-values are based on the χ2-test or Mann-Whitney U-test. Significant is at the 5% level.

**Abbreviations:** ALT, alanine aminotransferase;AST, aspartate aminotransferase; BMI, body mass index; DBP, diastolic blood pressure; EE, erosive esophagitis; F, female; FPG, fasting plasma glucose; GGT, gamma-glutamyl transpeptidase; HbA1c, hemoglobin A1c; *H. pylori*, *Helicobacter pylori*; HDL-C, high-density lipoprotein cholesterol; IGT, impaired glucose tolerance; LDL-C, low-density lipoprotein cholesterol; M, male; MS, metabolic syndrome; SBP, systolic blood pressure; T-CHO, total cholesterol; TG, triglyceride; UA, uric acid; WC, waist circumference.

**
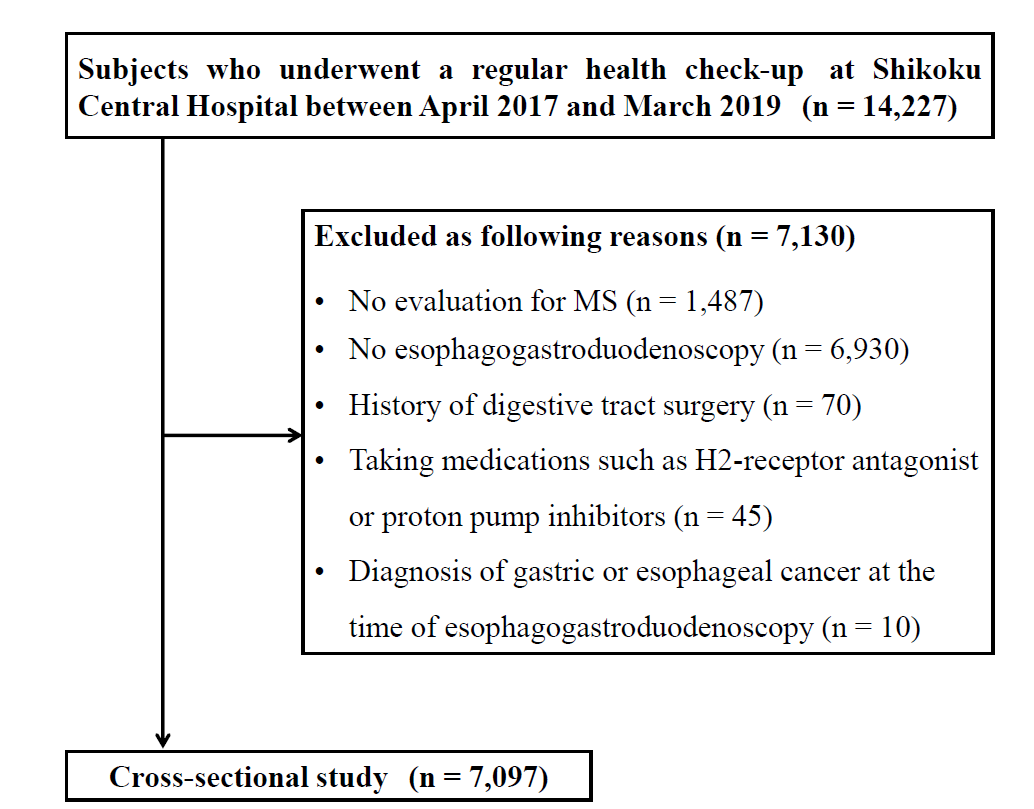
**

**Supplementary Figure 1** Flow diagram of the enrolment of subjects in this study.

**Abbreviations:** H, Histamine; MS, metabolic syndrome.
